# Supplementary material
Source: PubMed Central journal article supplement (PMC2655256)
Supplement: E08-07-0762_1.pdf [file E08-07-0762_1.pdf]

### **Supplemental Figure 1.**

#### **Acetylation of histone H3 in Jurkat cells following t-BHQ treatment.**

5 x10<sup>6</sup> Jurkat cells were treated with 50 uM t-BHQ for 1, 6 or 24 hrs. 50 ug of whole cell lysates were subjected to SDS-PAGE and Western blotting with anti-ferritin H, anti-acetyl histone H3 lysine 9 (H3K9), anti-acetyl histone H3 lysine 18 (H3K18), or anti-acetyl histone H3 antibody that detects acetyl H3K9 and H3K14. Jurkat cells were also treated with 5 mM sodium butyrate (NaBu) for 24 hrs as a positive control for histone acetylations. Western blotting for  $\beta$ -actin was shown for loading control of each cell lysate.

### **Supplemental Figure 2.**

#### **t-BHQ-mediated Nrf2 nuclear accumulation and the effect of the PI3K inhibitor or PTEN induction.**

A) 5x10<sup>6</sup> Jurkat cells were pretreated with 0.1% DMSO or 50 uM LY294002 for 1 hr, followed by treatment with 0, 10 or 50 uM t-BHQ for 6 hrs. Nuclear and cytoplasmic fractions were prepared and 30 ug of each fraction was subjected to Western blot using anti-Nrf2, anti-phospho-Ser473 AKT, anti-AKT, anti-Lamin B (as a nuclear fraction marker) or anti-LDH (as a cytoplasmic fraction marker) antibody. K562 cell lysates transiently transfected with pCMVNrf2 was loaded as a positive control of Nrf2 Western blotting. Representative results from five independent similar experiments are shown.

B) 5x10<sup>6</sup> tet-inducible PTEN Jurkat (PIJ17) cells were pretreated with or without 1 ug/ml Doxycycline for 24 hrs, followed by treatment with 2 or 10 uM t-BHQ for 6 hrs. Nuclear and cytoplasmic fractions were isolated and 30 ug of each fraction was subjected to

Western blot with anti-Nrf2 antibody. Lamin B and LDH western blots are for nuclear and cytoplasmic fraction markers, respectively. Representative results from six independent experiments are shown.

### **Supplemental Figure 3.**

#### **Effect of N-acetyl cysteine (NAC) pretreatment on t-BHQ-mediated ferritin H and NQO1 expression.**

Jurkat cells were pretreated with none, Tris-HCl (pH7.4, final 4 mM), or 2 mM N-acetyl cysteine (NAC, in final 4 mM Tris-HCl, pH 7.4) for 2 hrs and then treated with 10 or 30 uM t-BHQ for 24 hrs in the continuous presence of 2 mM NAC. Total RNA was isolated and subjected to Northern blotting for ferritin H and NQO1 mRNA expression.

### **Supplemental Table 1.**

#### **Antibodies, primers and siRNAs used in this study.**

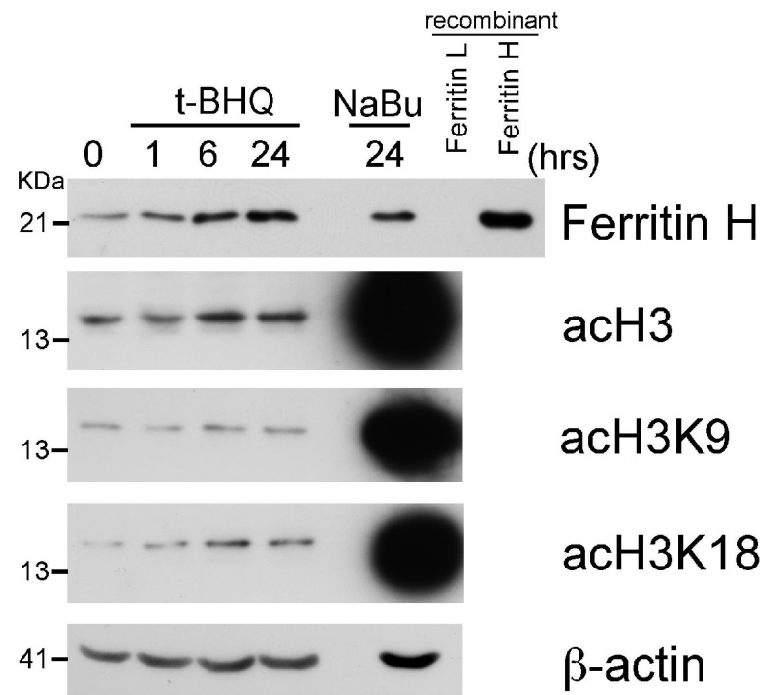

Supplemental Fig. 1

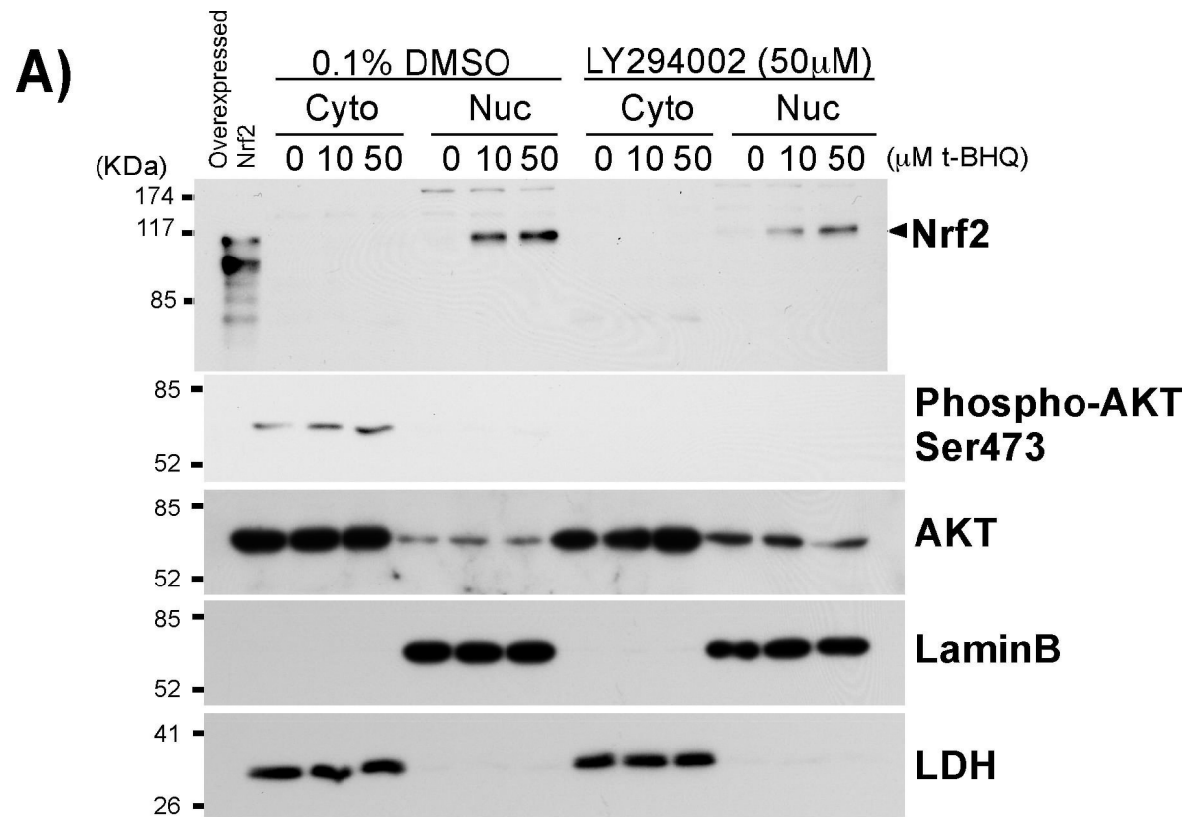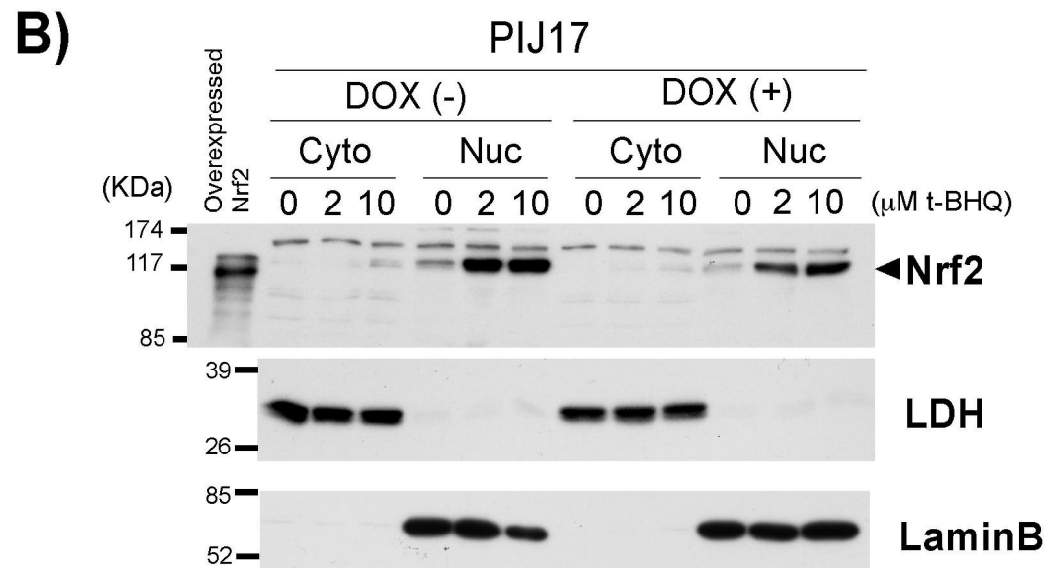

Supplemental Fig. 2

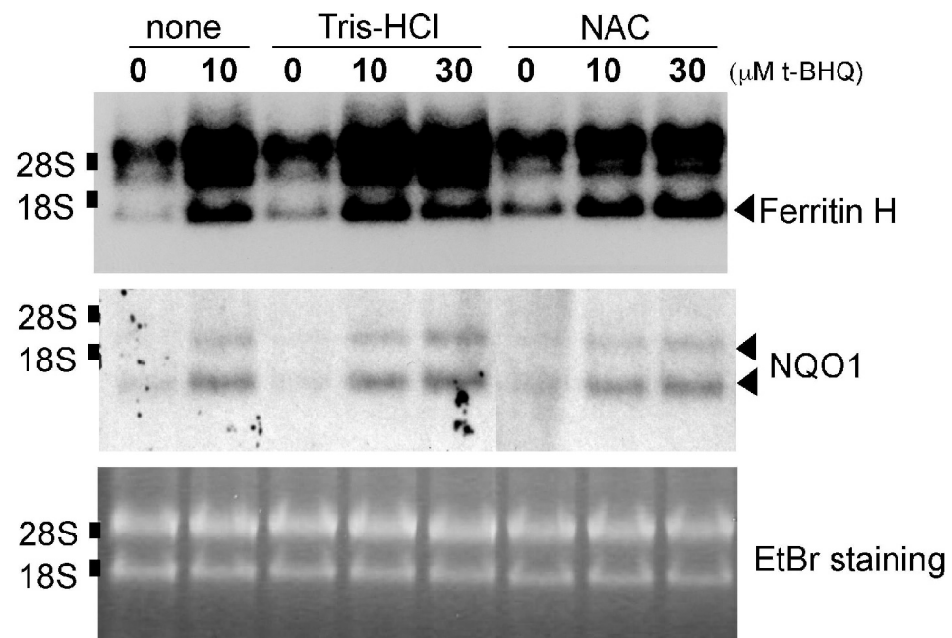

Supplemental Fig. 3

| <i>Antibodies</i>                                     | <i>Vender, Catalog number</i>         | <i>applications</i> |
|-------------------------------------------------------|---------------------------------------|---------------------|
| Anti-HA                                               | Covance, MMS-101R                     | Western             |
| Anti-ferritin H                                       | Santa Cruz Biotechnology<br>sc-25617  | Western             |
| Anti-AKT                                              | Cell Signaling, 9272                  | Western             |
| Anti-phosphoAKT Ser473                                | Cell Signaling, 9271                  | Western             |
| Anti-PTEN                                             | Cell Signaling, 9552/9556             | Western/ChIP        |
| Anti-Nrf2                                             | Santa Cruz Biotechnology<br>13032x    | Western, ChIP       |
| Anti-glyceraldehyde-3-phosphate dehydrogenase (GAPDH) | Chemicon/Millipore,<br>MAB374         | Western             |
| Anti- $\beta$ -actin                                  | Sigma, A5441                          | Western             |
| Anti-lamin B                                          | Oncogene, NA12                        | Western             |
| Anti-lactate dehydrogenase (LDH)                      | Chemicon/Millipore,<br>AB1222         | Western             |
| Anti-caspase 3                                        | Cell Signaling, 9665                  | Western             |
| Anti-Bach1                                            | Santa Cruz Biotechnology<br>sc-14700x | ChIP                |
| Anti-acetyl histone H3                                | Upstate, 06-599                       | Western             |
| Anti-acetyl histone H3 Lys9                           | Cell Signaling, 9671                  | Western             |
| Anti-acetyl histone H3 Lys9                           | Upstate, 07-352                       | ChIP                |
| Anti-acetyl histone H3 Lys14                          | Upstate, 07-353                       | ChIP                |
| Anti-acetyl histone H3 Lys18                          | Cell Signaling, 9675                  | Western, ChIP       |
| Anti-p300                                             | Santa Cruz Biotechnology<br>sc-585x   | ChIP                |
| Anti-CBP                                              | Santa Cruz Biotechnology<br>sc-369x   | ChIP                |

| <i>ChIP assay primer sequences</i> | <i>PCR amplification target</i> |
|------------------------------------|---------------------------------|
| 5'-CCCTCCAGGTCTTATGACTGCTC-3'      | Ferritin H ARE forward          |
| 5'-GTTTCTGGAGGTTTCAGCACGTC-3'      | Ferritin H ARE reverse          |
| 5'-CACACTGACTCCTCCAAATGAACTTTAG-3' | Ferritin H non-ARE forward      |
| 5'-GTACCATATTCCCAAATGGTCGGTC-3'    | Ferritin H non-ARE reverse      |
| 5'-TAGGAGGCTCAGAGCGACCA-3'         | Rad51 forward                   |
| 5'-GTCCGCCAGCGGCTTTCAGAA-3'        | Rad51 reverse                   |

| <i>siRNA sequences</i>      | <i>RNA interference target</i>            |
|-----------------------------|-------------------------------------------|
| 5'-GUGAAGAUCUUGACCAAUGUU-3' | siPTEN (sense D-003023-05, Dharmacon)     |
| 5'-CAUUGGUCAAGAUCUUCACUU-3' | siPTEN (antisense D-003023-05, Dharmacon) |

**Supplemental Table 1**
